# Supplementary material for: Asymmetries of Left and Right Adrenal Glands in Neural Innervation and Glucocorticoids Production
Source: MDPI journal article supplement (doi:10.3390/ijms242417456), 2023-12-14

### Supplementary figures

**Figure S1 Morphology, histology, and lipid storage between left and right adrenal glands in mice**

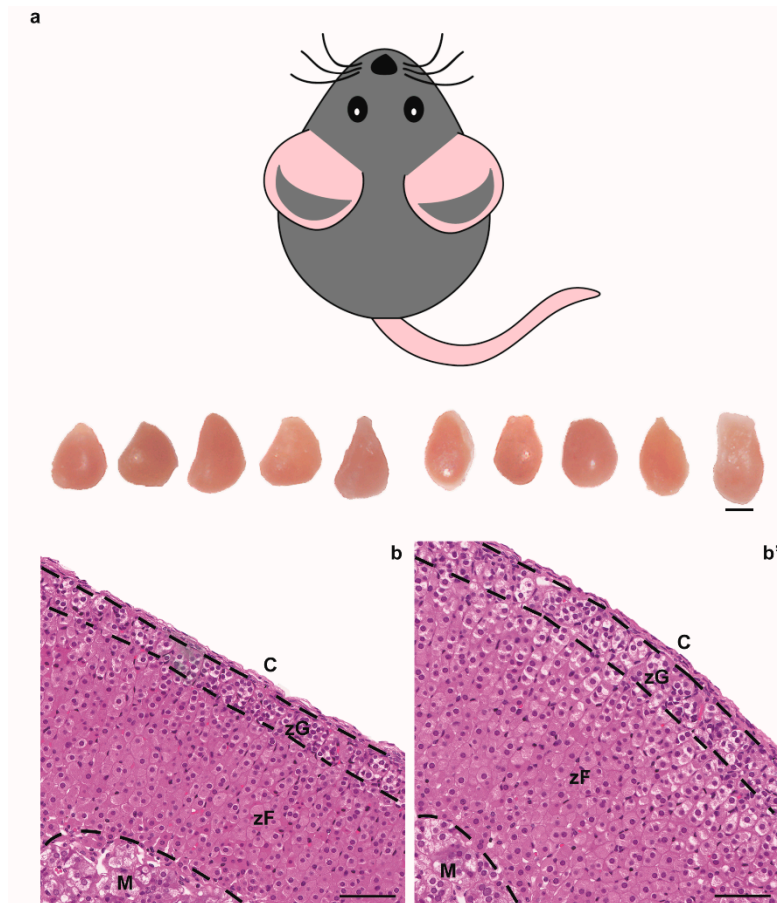

Comparison of morphology (a) and histology (b) between left and right adrenal glands. Scale bars are 0.5 mm and 100  $\mu$ m respectively.

**Figure S2** Hierarchical dendrogram of biological replicates between the left and right adrenal gland RNA sequencing.

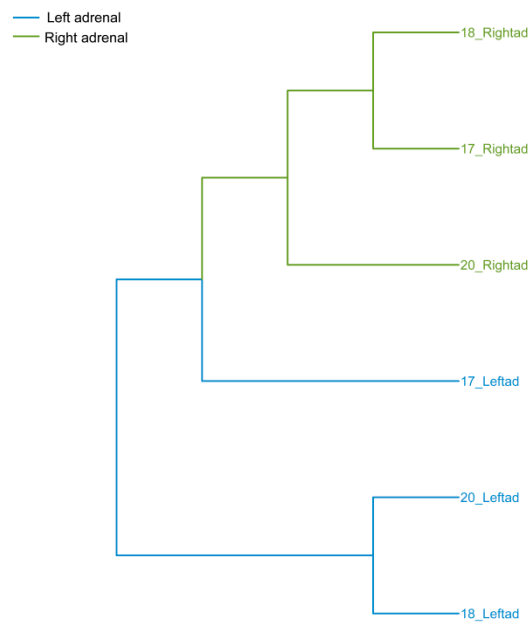

**Figure S3** PCA plot of biological replicates between the left and right adrenal gland RNA sequencing.

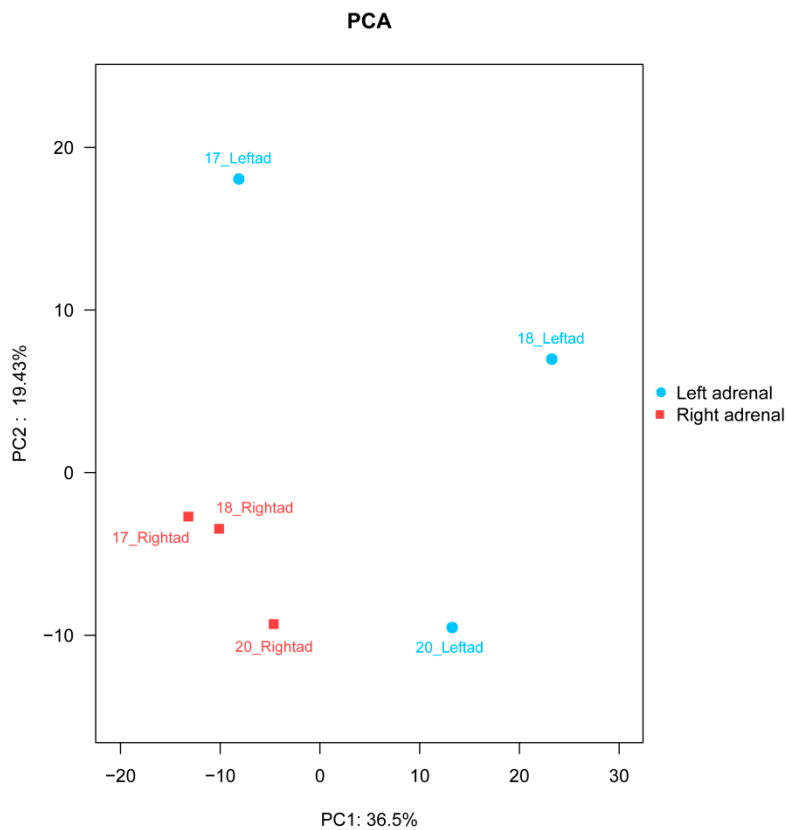

**Figure S4** Top 10 significantly enriched GO terms in three GO classifications BP, CC and MF

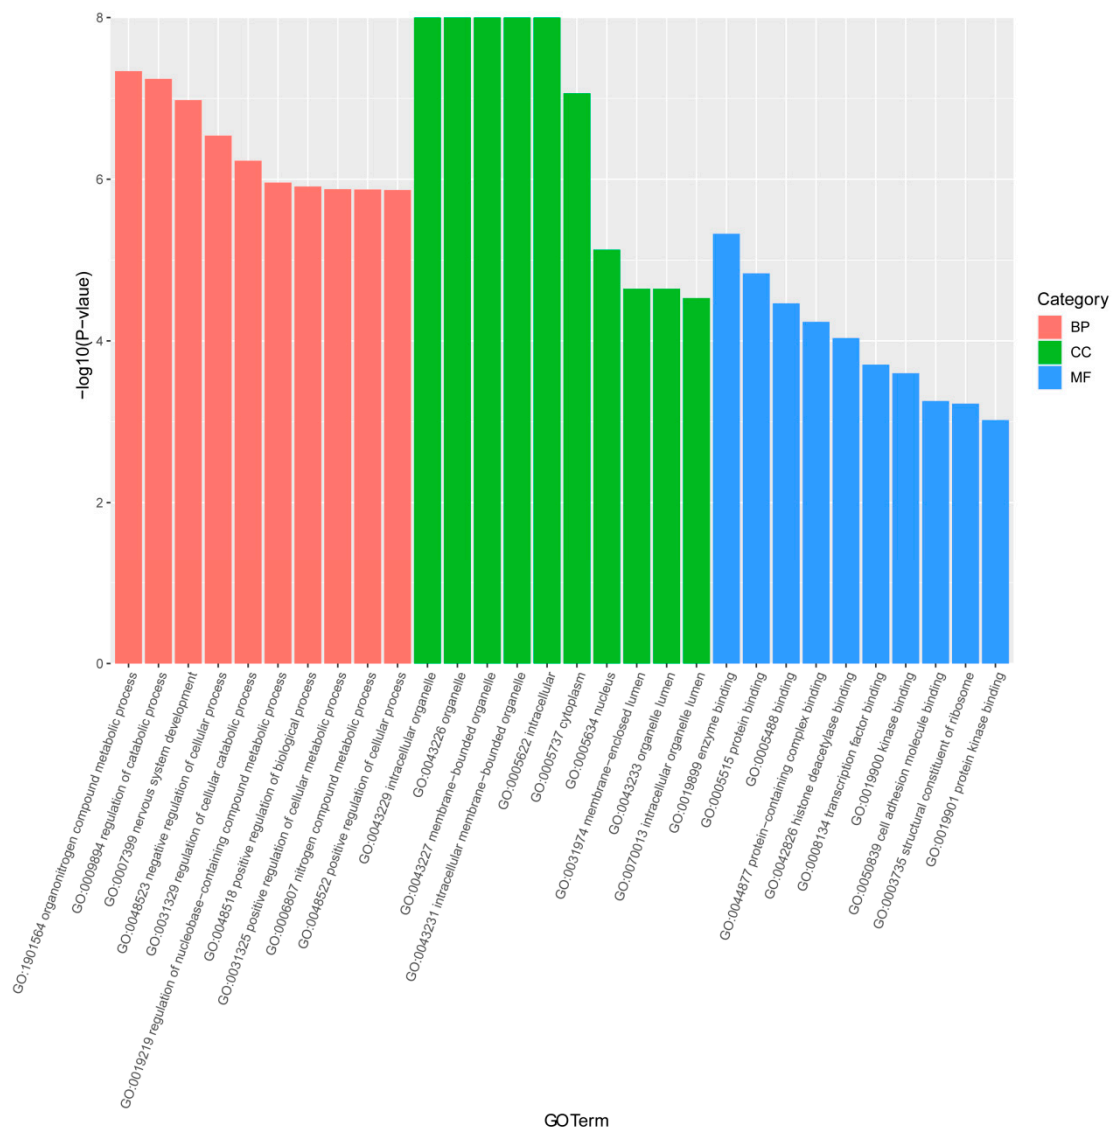

Supplement: s1 [file s1]
